# Supplementary material for: Targeting AGTR1/NF-κB/CXCR4 axis by miR-155 attenuates oncogenesis in glioblastoma
Source: PubMed Central journal article supplement — Neoplasia. 2020 Sep 5;22(10):497–510. doi: 10.1016/j.neo.2020.08.002 (PMC7481885; doi:10.1016/j.neo.2020.08.002), 2020-09-05
Supplement: mmc1.pdf [file mmc1.pdf]

| <b>Supplementary Table S1: List of primers used</b> |                       |                      |                                    |
|-----------------------------------------------------|-----------------------|----------------------|------------------------------------|
|                                                     |                       |                      |                                    |
| <b>Quantitative PCR (qPCR) primers</b>              |                       |                      |                                    |
| <b>Sr. No.</b>                                      | <b>Gene</b>           | <b>Primer Name</b>   | <b>Sequence (5'-3')</b>            |
| 1                                                   | <i>AGTR1</i>          | AGTR1_FP             | GCT TTC CTA CCG CCC CTC AGA        |
|                                                     |                       | AGTR1_RP             | TTT CGA ACA TGT CAC TCA ACC TCA A  |
| 2                                                   | <i>CXCR4</i>          | CXRC4_FP             | CAA GAC CAC AGT CAT CCT CAT C      |
|                                                     |                       | CXRC4_RP             | CTC AAA CTC ACA CCC TTG CT         |
| 3                                                   | <i>CDH2</i>           | N-CADHERIN_FP        | TGACTCCCTGTTAGTGTGTTGAC            |
|                                                     |                       | N-CADHERIN_RP        | CCCAGTCGTTTCAGGTAATCATAG           |
| 4                                                   | <i>CDH1</i>           | E-CADHERIN_FP        | CTT CTG CTG ATC CTG TCT GAT G      |
|                                                     |                       | E-CADHERIN_RP        | TGC TGT GAA GGG AGA TGT ATT G      |
| 5                                                   | <i>SNAI2</i>          | SLUG_FP              | GGTTGCTTCAAGGACACATTAG             |
|                                                     |                       | SLUG_RP              | GCAGATGAGCCCTCAGATTT               |
| 6                                                   | <i>VIM</i>            | VIMENTIN_FP          | GATTAACCTCCCTCTGGTTGATAC           |
|                                                     |                       | VIMENTIN_RP          | GTCATCGTGATGCTGAGAAGT              |
| 7                                                   | <i>PDGFRB</i>         | PDGFRB_FP            | CAC CCT CAG TCT TAA TCC ATC C      |
|                                                     |                       | PDGFRB_RP            | CCA CAC TGG CAC ATT TAC ATT C      |
| 8                                                   | <i>AGR2</i>           | AGR2_FP              | AAA TCT CCA AGC CCT TCT GTC        |
|                                                     |                       | AGR2_RP              | TCA GTG TGT TCA CTA TGC TTC C      |
| 9                                                   | <i>NES</i>            | NES_FP               | CTC AGG AGC AGC ACT CTT AAC        |
|                                                     |                       | NES_RP               | ATT CCT ACA GCC TCC ATT CTT G      |
| 10                                                  | <i>GAPDH</i>          | GAPDH_FP             | TGC ACC ACC AAC TGC TTA GC         |
|                                                     |                       | GAPDH_RP             | GGC ATG GAC TGT GGT CAT GAG        |
| 11                                                  | <i>KIT</i>            | KIT_FP               | CAA GGC TTC TCC AAT TCT GC         |
|                                                     |                       | KIT_RP               | TGCAGTGGTCCACAGAAGAG               |
| 12                                                  | <i>CD24</i>           | CD24_FP              | TCC TCC CAG AGT ACT TCC AA         |
|                                                     |                       | CD24_RP              | GAT GCA GAA GAG AGA GTG AGA C      |
|                                                     |                       |                      |                                    |
| <b>Primers for Cloning</b>                          |                       |                      |                                    |
| 1                                                   | 3'UTR<br><i>AGTR1</i> | 3'UTR AGTR1_EcoRI_FP | CCG GAA TTC ATG TTT TGA GGT TGA G  |
|                                                     |                       | 3'UTR_AGTR1_XhoI_RP  | CCG CTC GAG TTA GCA TAT CTT TGT AC |
